# Supplementary material for: Large-scale assessment of commensalistic–mutualistic associations between African birds and herbivorous mammals using internet photos
Source: PeerJ. 2018 Mar 19;6:e4520. doi: 10.7717/peerj.4520 (PMC5863707; doi:10.7717/peerj.4520)
Supplement: Appendix S1 [file peerj-06-4520-s001.xlsx]

## Sheet: S1 Appendix
S1 Appendix. Bird (a) and mammal (b) names used in internet search.
(a) bee-eater, cormorant, crake, crow, darter, drongo, duck, eagle, egret, falcon, goose, gull, hammerkop, hawk, heron, ibis, jacana, kestrel, kingfisher, lapwing, myna, oxpecker, piapiac, plover, pratincole, raven, roller, sandpiper, shrike, starling, stint, stork, tern, wagtail
(b) addax, antelope, beira, bluebuck, bongo, buffalo, bushbuck, bushpig, dibatag, dik-dik, duiker, eland, elephant, gazelle, gemsbok, gerenuk, giraffe, grysbok, hartebeest, hippopotamus, hirola, hog, chevrotain, impala, klipspringer, kob, kudu, lechwe, nyala, okapi, oribi, oryx, puku, reedbuck, rhebok, rhinoceros, sitatunga, springbok, steenbok, suni, topi, warthog, waterbuck, wildebeest, zebra
