# Supplementary material for: Large-scale assessment of commensalistic–mutualistic associations between African birds and herbivorous mammals using internet photos
Source: PeerJ. 2018 Mar 19;6:e4520. doi: 10.7717/peerj.4520 (PMC5863707; doi:10.7717/peerj.4520)
Supplement: Appendix S3 — This includes mean number of birds and mean mass of birds per mammal individual (g), total number of bird species per mammal species, mammal body mass (kg), mammal herd size, habitat openness and number of photos analysed per species (N). [file peerj-06-4520-s003.xlsx]

## Sheet: S3 Appendix
S3 Appendix. Bird–mammal association data for PGLS regressions. This includes mean number of birds and mean mass of birds per mammal individual (g), total number of bird species per mammal species, mammal body mass (kg), mammal herd size, habitat openness and number of photos analysed per species (N).
Mammal species	Number of birds	Mass of birds	Number of bird species	Mammal body mass	Mammal herd size	Habitat openess	N
Oryx beisa	1.714	88.5	2	188	1.571	2	7
Hippotragus niger	3.25	164.97	1	236	1.21	2.1	24
Hippotragus equinus	2.125	125.031	2	264	2.38	1.929	16
Alcelaphus buselaphus	4	502	1	161	1	2	1
Connochaetes gnou	3	337.5	1	157	1	2	1
Connochaetes taurinus	2.064	238.915	8	199	6.24	1.97	47
Eudorcas thomsonii	1	50.5	1	23	1	2	3
Antidorcas marsupialis	1	50.5	1	34	1	2	2
Oreotragus oreotragus	1.25	141.75	2	13	1	2	4
Kobus ellipsiprymnus	1.222	70.806	2	204	1.22	2.167	9
Redunca arundinum	2	101	1	58	2	2.027	1
Aepyceros melampus	1.746	89.376	2	53	2.29	2.67	205
Syncerus caffer	2.342	298.905	14	593	4.405	1.958	404
Tragelaphus spekii	1.75	191	2	76	1	1	4
Tragelaphus scriptus	2.16	110.16	2	45	1.04	1.563	25
Tragelaphus oryx	2.944	226.463	3	563	1.852	1.952	56
Tragelaphus strepsiceros	2.33	123.902	3	206	1.22	2.109	94
Tragelaphus angasii	2.111	107.361	1	88	1	2.6	9
Tragelaphus imberbis	1	50.5	1	94	1	2	2
Taurotragus derbianus	2	128	1	646	1	2.5	2
Giraffa camelopardalis	2.659	145.658	3	965	1.11	2.37	208
Hippopotamus amphibius	2.084	871.65	31	1536	8.2	1.053	356
Phacochoerus africanus	2.068	136.037	8	82	1.193	1.845	88
Hylochoerus meinertzhageni	1	63.13	1	198	1.5	1.33	4
Potamochoerus larvatus	2	101	1	69	1.423	1.853	2
Diceros bicornis	2.8	189.39	5	996	1.26	2.079	50
Ceratotherium simum	2.612	199.92	8	2283	1.3	2.088	201
Equus zebra	1	50.5	1	282	2	3	1
Equus burchellii	1.971	190.689	10	401	1.53	2	240
Equus grevyi	1.429	85	4	407	1	2	7
Loxodonta africana	1.936	516.776	5	3795	3.013	1.824	80
